# Supplementary material for: Improved transparency and conductivity in copper chromium oxide coatings through aliovalent doping and stoichiometry control
Source: Royal Society of Chemistry journal article supplement (doi:10.1039/d3lf00227f), 2024-01-01
Supplement: d3lf00227f1.pdf [file d3lf00227f1.pdf]

# Electronic Supplementary Information

## Improved Transparency in Highly Conductive Copper Chromium Oxide Coatings through Mg Doping and Stoichiometry Control

Jaewon Kim<sup>a,b</sup>, Owen Kendall<sup>b</sup>, Triet Thien Huu Nguyen,<sup>b</sup> Joel van Embden<sup>b</sup>, Enrico Della Gaspera<sup>b</sup>

<sup>a</sup> *Institute of Materials Research and Engineering, Agency for Science, Technology and Research, 2*

*Fusionopolis Way, Singapore 138634, Singapore*

<sup>b</sup> *School of Science, RMIT University, Melbourne VIC 3000, Australia*

Correspondence should be addressed to: [jaewon\\_kim@imre.a-star.edu.sg](mailto:jaewon_kim@imre.a-star.edu.sg) and [enrico.dellagaspera@rmit.edu.au](mailto:enrico.dellagaspera@rmit.edu.au).

**Figure S1.** Compositional analysis via EDX of the  $\text{CuCrO}_2$  films. Left panel: experimental vs. nominal Mg amount. Right panel: amount of Cu and (Cr+Mg) as a function of the amount of Mg introduced.

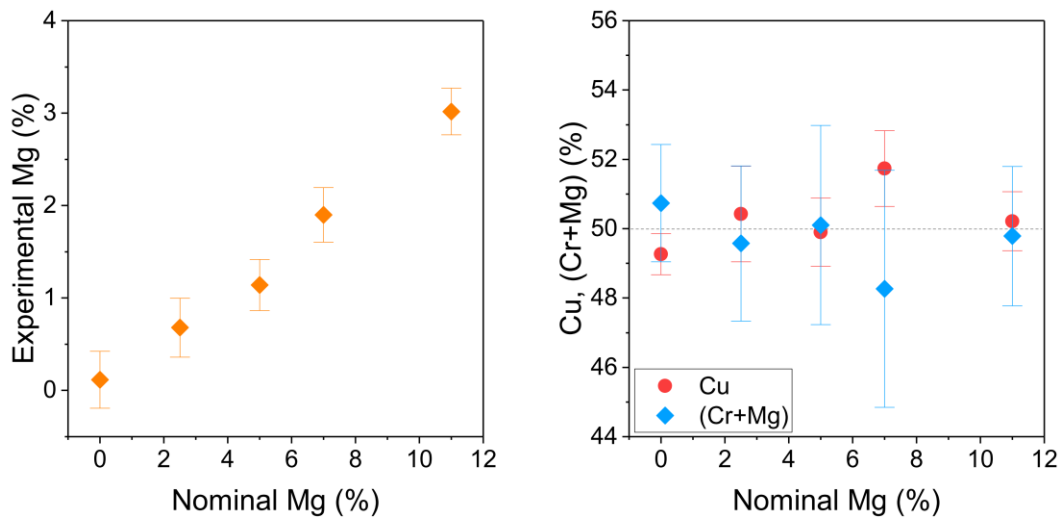

**Figure S2.** XRD patterns of Mg-doped  $\text{CuCrO}_2$  coatings highlighting the main diffraction peak at  $\sim 36.5^\circ$ . The black vertical dash line represents the expected (012) peak position according to ICDD No. 74-0983.

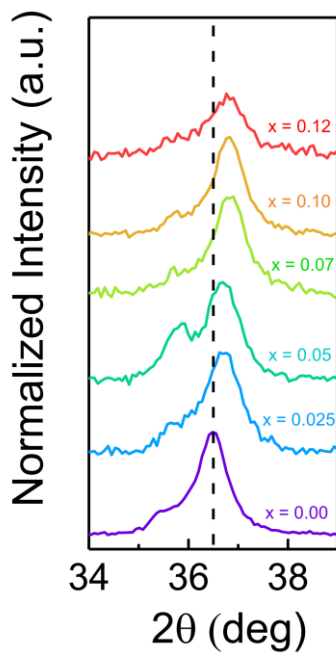

**Figure S3.** SEM top view images for the  $\text{CuCrO}_2$  coatings at various Mg dopant concentrations from  $x=0$  (undoped) to  $x=0.12$ . The scale bar is  $2\ \mu\text{m}$  for all the low-magnification images and  $400\ \text{nm}$  for all the high-magnification images.

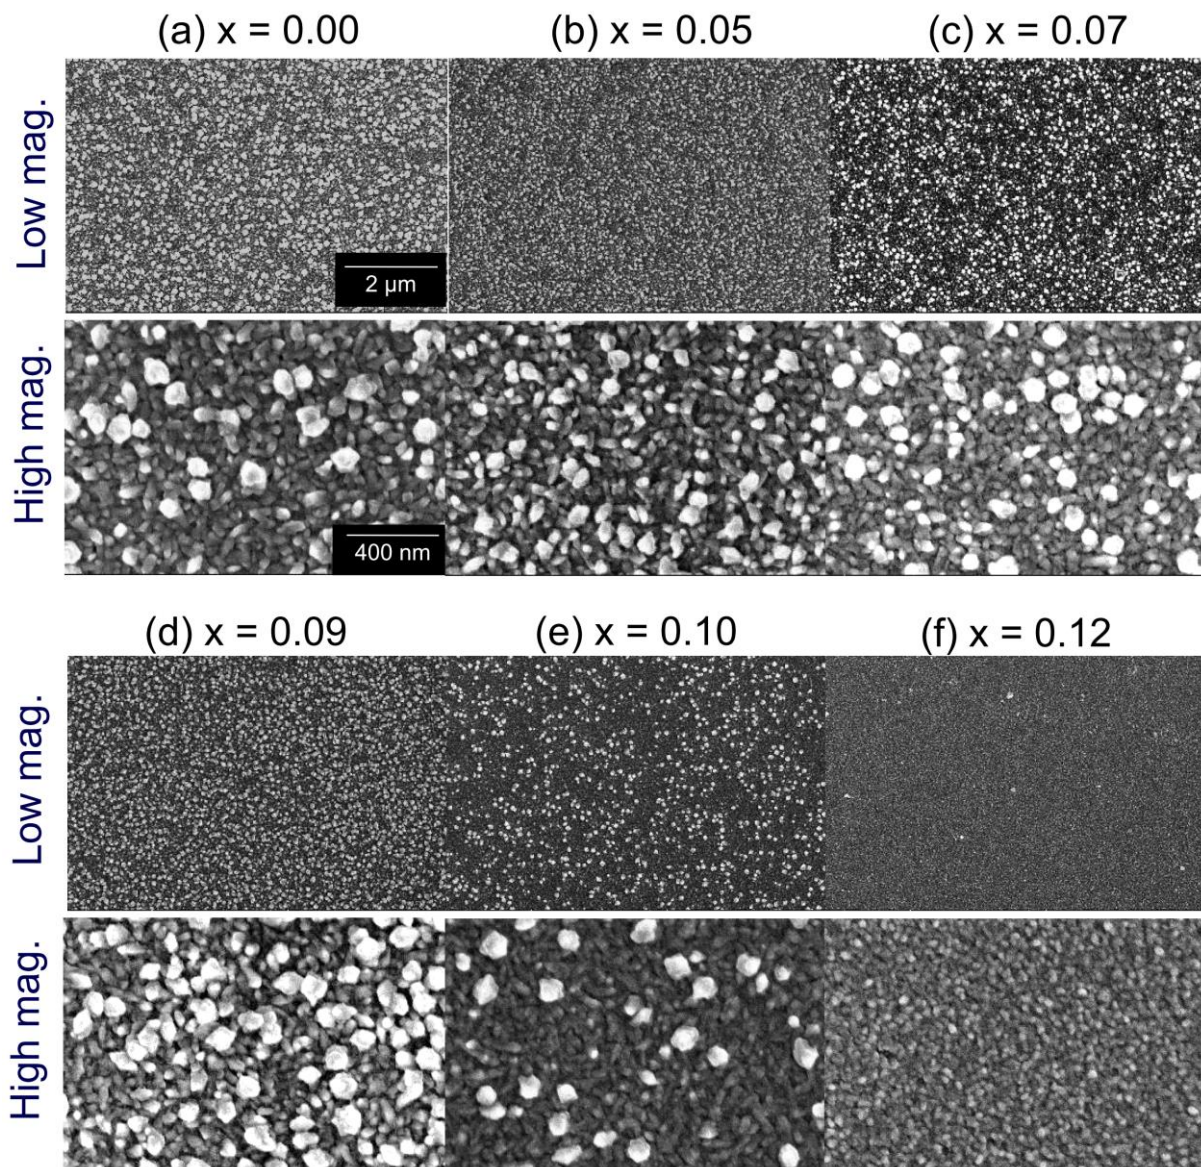

**Figure S4.** Cross-sectional SEM images for  $\text{CuCrO}_2$  films at different Mg concentrations. The scale bar is  $200\ \text{nm}$  and is common to all panels.

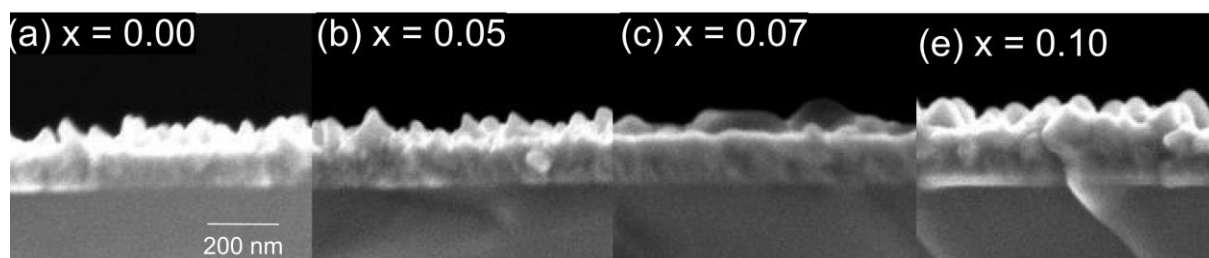

**Figure S5.** XPS survey spectrum of a typical Mg-doped  $\text{CuCrO}_2$  film.

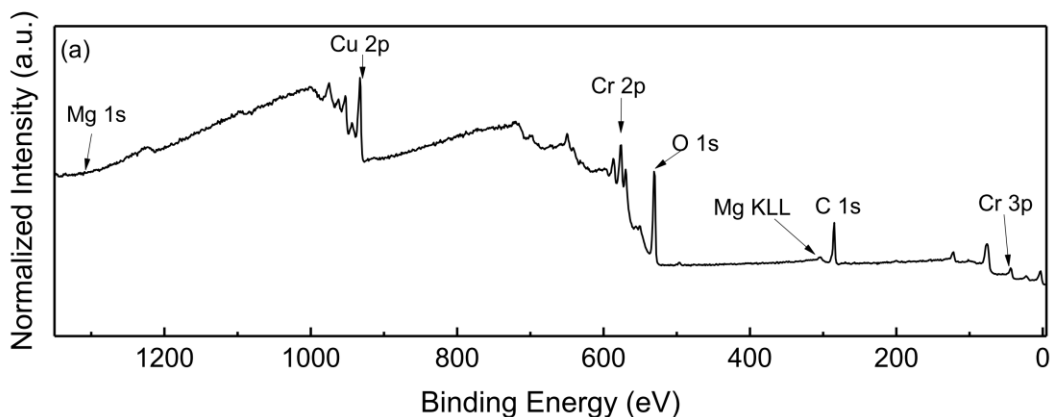

**Figure S6.** XPS spectra and respective fittings of Cu 2p, Cr 2p and O 1s regions for a typical Mg-doped  $\text{CuCrO}_2$  sample.

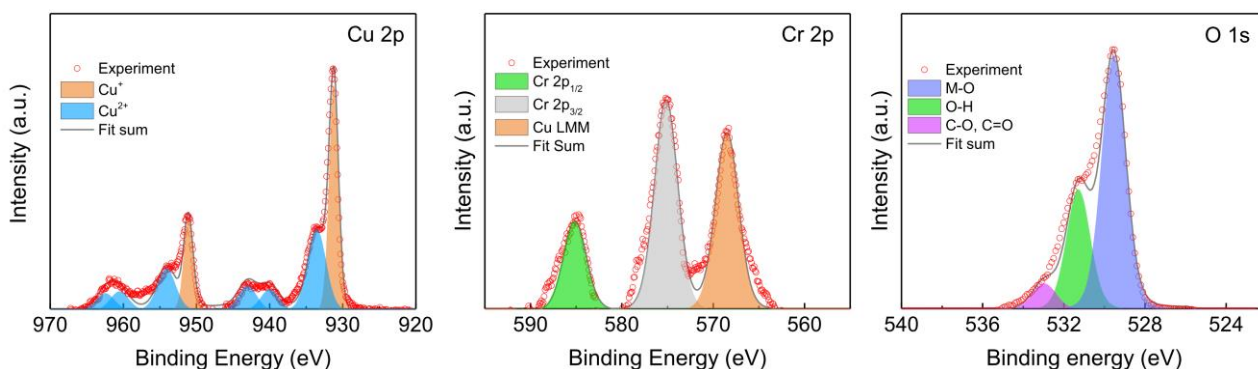

**Figure S7.** XPS spectra of a) Cr 3p and Mg 2p region, and b) valence band (VB) region at various Mg concentrations.

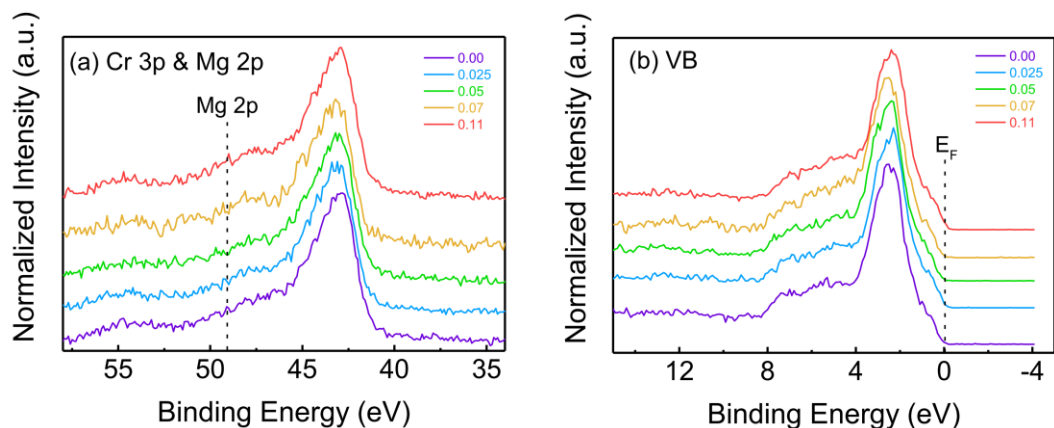

**Figure S8.** Average visible transmittance (wavelength between 400 nm to 800 nm) for  $\text{CuCrO}_2$  films as a function of Mg concentration. The black triangle shows the value for a conventional, copper-rich film.

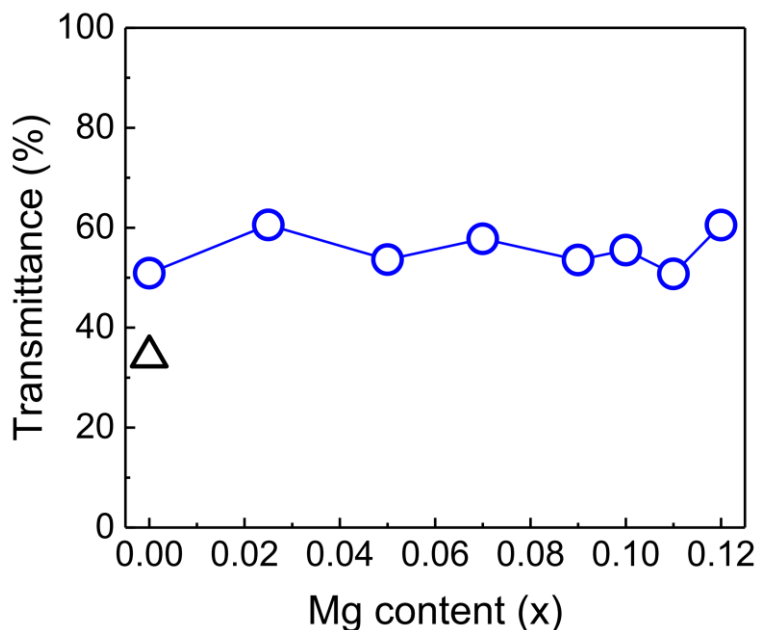

**Figure S9.** Absorbance (A) spectra for undoped  $\text{CuCrO}_2$  films on borosilicate glass prepared from copper-deficient precursors (nominally  $[\text{Cu}_{0.4}\text{Cr}_{0.6}\text{O}]_2$ ) and stoichiometric precursors (nominally  $[\text{Cu}_{0.5}\text{Cr}_{0.5}\text{O}]_2$ ). These have been calculated from Transmittance (T) and reflectance (R) spectra, through the relationship  $A = 100 - T - R$  (%).

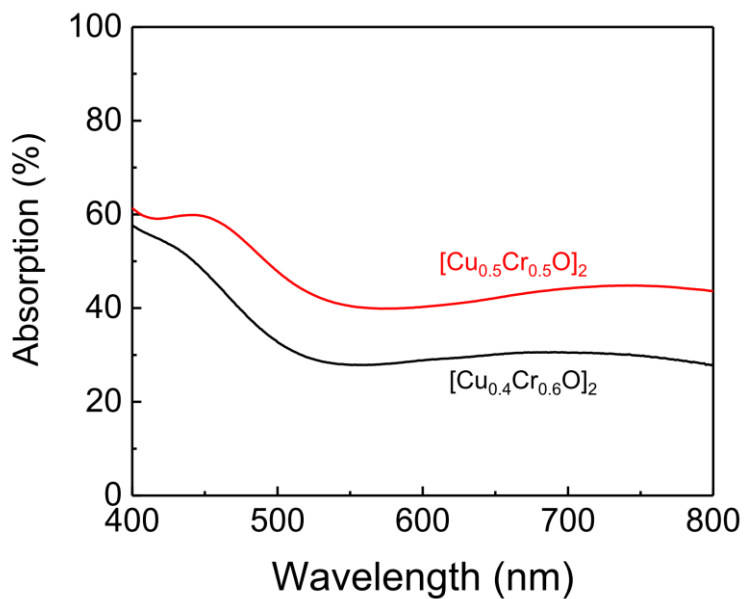

**Figure S10.** Reflectance spectra for  $\text{CuCrO}_2$  films as a function of the Mg dopant concentration. The inset shows the average reflectance in the visible region (400 nm to 800 nm).

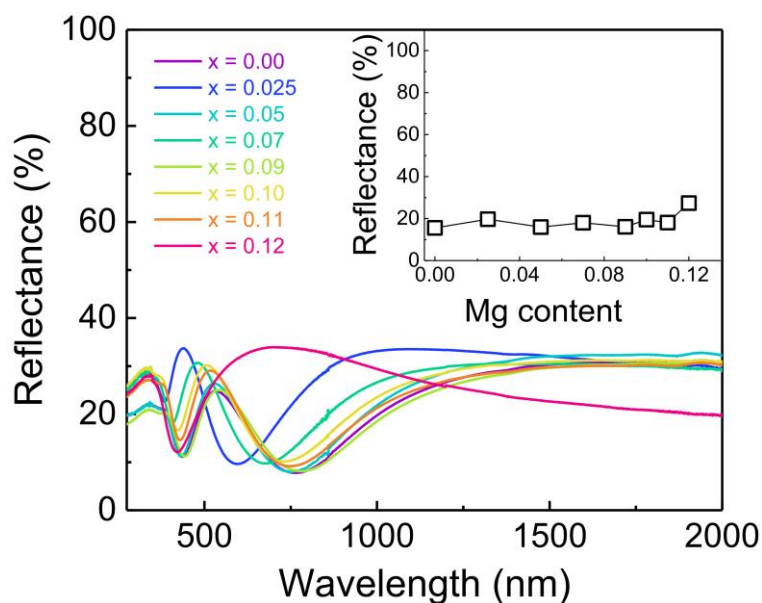

**Table S1.** Compositional analysis obtained via EDX. The incorporation efficiency quantifies the amount (in %) of Mg that was detected in the films, compared to the amount of Mg used in the precursor solution.

| Nominal Mg (%) | Real Mg (%) | Incorporation efficiency (%) | Nominal Cu (%) | Nominal (Cr+Mg) (%) | Real Cu (%) | Real (Cr+Mg) (%) |
|----------------|-------------|------------------------------|----------------|---------------------|-------------|------------------|
| 0              | 0.12±0.31   | N/A                          | 40             | 60                  | 49.3±0.6    | 50.7±1.7         |
| 2.5            | 0.68±0.32   | 27.2                         | 40             | 60                  | 50.4±1.4    | 49.6±2.2         |
| 5              | 1.14±0.28   | 22.8                         | 40             | 60                  | 49.9±1.0    | 50.1±2.9         |
| 7              | 1.90±0.30   | 27.1                         | 40             | 60                  | 51.7±1.1    | 48.3±3.4         |
| 11             | 3.02±0.25   | 27.4                         | 40             | 60                  | 50.2±0.8    | 49.8±2.0         |

**Table S2.** Values for visible transmittance vs. conductivity for CuCrO<sub>2</sub> and CuGaO<sub>2</sub> films reported in the literature and for some of the best samples presented in this study.

| Material                                                                   | Conductivity<br>(S cm <sup>-1</sup> ) | Vis. transmittance<br>(%) | Reference |
|----------------------------------------------------------------------------|---------------------------------------|---------------------------|-----------|
| CuCrO <sub>2</sub>                                                         | 0.017                                 | 60                        | [1]       |
| CuCrO <sub>2</sub>                                                         | 0.140                                 | 70                        | [2]       |
| CuCrO <sub>2</sub>                                                         | 50                                    | 52                        | [3]       |
| CuCrO <sub>2</sub>                                                         | 0.232                                 | 62                        | [4]       |
| CuCrO <sub>2</sub>                                                         | 35                                    | 51                        | [5]       |
| CuCrO <sub>2</sub>                                                         | 0.083                                 | 55                        | [6]       |
| CuCrO <sub>2</sub>                                                         | 0.25                                  | 55                        | [7]       |
| CuCrO <sub>2</sub>                                                         | 17                                    | 40                        | [8]       |
| Mg-doped CuCrO <sub>2</sub>                                                | 0.136                                 | 65                        | [9]       |
| Mg-doped CuCrO <sub>2</sub>                                                | 1.0                                   | 80                        | [10]      |
| Mg-doped CuCrO <sub>2</sub>                                                | 2.174                                 | 57                        | [11]      |
| Mg-doped CuCrO <sub>2</sub>                                                | 220                                   | 30                        | [12]      |
| Mg-doped CuCrO <sub>2</sub>                                                | 217                                   | 70                        | [13]      |
| Zn-doped CuCrO <sub>2</sub>                                                | 0.262                                 | 68                        | [14]      |
| CuGaO <sub>2</sub>                                                         | 0.063                                 | 80                        | [15]      |
| CuGaO <sub>2</sub>                                                         | 0.015                                 | 80                        | [16]      |
| CuGaO <sub>2</sub>                                                         | 0.004                                 | 60                        | [17]      |
| This work <sup>a</sup>                                                     |                                       |                           |           |
| [Cu <sub>0.4</sub> Cr <sub>0.575</sub> Mg <sub>0.025</sub> O] <sub>2</sub> | 13.3                                  | 60.5                      | This work |
| [Cu <sub>0.4</sub> Cr <sub>0.55</sub> Mg <sub>0.05</sub> O] <sub>2</sub>   | 21.2                                  | 53.6                      | This work |
| [Cu <sub>0.4</sub> Cr <sub>0.53</sub> Mg <sub>0.07</sub> O] <sub>2</sub>   | 19.2                                  | 57.8                      | This work |
| [Cu <sub>0.4</sub> Cr <sub>0.50</sub> Mg <sub>0.10</sub> O] <sub>2</sub>   | 26.8                                  | 55.5                      | This work |
| [Cu <sub>0.4</sub> Cr <sub>0.49</sub> Mg <sub>0.11</sub> O] <sub>2</sub>   | 52.8                                  | 50.8                      | This work |
| [Cu <sub>0.4</sub> Cr <sub>0.48</sub> Mg <sub>0.12</sub> O] <sub>2</sub>   | 44.5                                  | 60.5                      | This work |

<sup>a</sup> the compositions listed are nominal, based on the amount of precursors used

## References

1. Han, M., et al., *Structural, electronic band transition and optoelectronic properties of delafossite  $\text{CuGa}_{1-x}\text{Cr}_x\text{O}_2$  ( $0 < x < 1$ ) solid solution films grown by the sol-gel method*. 2012. **22**(35): p. 18463-1847.
2. Wang, J., et al., *Combustion Synthesis of p-Type Transparent Conducting  $\text{CuCrO}_{2+x}$  and  $\text{Cu:CrO}_x$  Thin Films at 180 °C*. ACS Applied Materials & Interfaces, 2018. **10**(4): p. 3732-3738.
3. Bottiglieri, L., et al., *Out of stoichiometry  $\text{CuCrO}_2$  films as a promising p-type TCO for transparent electronics*. Materials advances, 2021. **2**(14): p. 4721-4732.
4. Yu, R.-S. and C.-M. Wu, *Characteristics of p-type transparent conductive  $\text{CuCrO}_2$  thin films*. Applied surface science, 2013. **282**: p. 92-97.
5. Sánchez-Alarcón, R.I., et al., *Ultrasonic spray-pyrolyzed  $\text{CuCrO}_2$  thin films*. Journal of physics. D, Applied physics, 2016. **49**(17).
6. Farrell, L., et al., *Spray pyrolysis growth of a high figure of merit, nano-crystalline, p-type transparent conducting material at low temperature*. Applied physics letters, 2015. **107**(3).
7. Farrell, L., et al., *Synthesis of nanocrystalline Cu deficient  $\text{CuCrO}_2$  - a high figure of merit p-type transparent semiconductor*. Journal of materials chemistry. C, Materials for optical and electronic devices, 2016. **4**(1): p. 126-134.
8. Crépellière, J., et al., *Transparent conductive  $\text{CuCrO}_2$  thin films deposited by pulsed injection metal organic chemical vapor deposition: up-scalable process technology for an improved transparency/conductivity trade-off*. 2016. **4**(19): p. 4278-4287.
9. Wang, Y., et al., *Structural, optical and electrical properties of Mg-doped  $\text{CuCrO}_2$  thin films by sol—gel processing*. Journal of alloys and compounds, 2011. **509**(19): p. 5897-5902.



10. Lim, S.H., S. Desu, and A.C. Rastogi, *Chemical spray pyrolysis deposition and characterization of p-type CuCr<sub>1-x</sub>Mg<sub>x</sub>O<sub>2</sub> transparent oxide semiconductor thin films*. The Journal of physics and chemistry of solids, 2008. **69**(8): p. 2047-2056.
11. Ohno, K., et al., *Effect of forming gas annealing on improvement in crystal orientation of solid-phase calcined CuCrO<sub>2</sub> thin film*. Thin solid films, 2020. **714**: p. 138386.
12. Nagarajan, R., et al., *p-type conductivity in CuCr<sub>1-x</sub>Mg<sub>x</sub>O<sub>2</sub> films and powders*. Journal of Applied Physics, 2001. **89**(12): p. 8022-8025.
13. Tripathi, T.S. and M. Karppinen, *Enhanced p-Type Transparent Semiconducting Characteristics for ALD-Grown Mg-Substituted CuCrO<sub>2</sub> Thin Films*. Advanced electronic materials, 2017. **3**(6): p. n/a.
14. Yu, R.-S. and C. Chu, *Synthesis and Characteristics of Zn-Doped CuCrO<sub>2</sub> Transparent Conductive Thin Films*. Coatings (Basel), 2019. **9**(5): p. 321.
15. Ueda, K., et al., *Epitaxial growth of transparent p-type conducting CuGaO<sub>2</sub> thin films on sapphire (001) substrates by pulsed laser deposition*. Journal of Applied Physics, 2001. **89**(3): p. 1790-1793.
16. Alias, A., et al., *Characterization of CuGaO<sub>2</sub> films prepared by sol-gel methods*. physica status solidi c, 2012. **9**(2): p. 198-201.
17. Ehara, T., *Preparation of CuGaO<sub>2</sub> thin film by a sol-gel method using two kinds of metal source combination*. Journal of Materials Science and Chemical Engineering, 2018. **6**(8): p. 68-78.
